# Supplementary material for: Analysis of risk factors for severe acute kidney injury in patients with acute myocardial infarction: A retrospective study
Source: PubMed Central journal article supplement (PMC10479598; doi:10.3389/fneph.2023.1047249), 2023-02-09
Supplement: DataSheet_1.pdf [file DataSheet_1.pdf]

## *Supplementary Material*

**Supplementary material Table 1.** Diagnostic ICD code for patients with acute myocardial infarction

| ICD 9 code    | Classification of diagnosis                                 |
|---------------|-------------------------------------------------------------|
| 410.00-410.02 | Acute myocardial infarction; of anterolateral wall          |
| 410.20-410.22 | Acute myocardial infarction; of inferolateral wall          |
| 410.30-410.32 | Acute myocardial infarction; of inferoposterior wall        |
| 410.40-410.42 | Acute myocardial infarction; of other inferior wall         |
| 410.10-410.12 | Acute myocardial infarction; of other anterior wall         |
| 410.50-410.52 | Acute myocardial infarction; of other lateral wall          |
| 410.60-410.62 | Acute myocardial infarction; true posterior wall infarction |
| 410.70-410.72 | Acute myocardial infarction; subendocardial infarction      |
| 410.80-410.82 | Acute myocardial infarction; of other specified sites       |
| 410.90-410.92 | Unspecified site                                            |

**Supplementary Tables 2.** Diagnostic code for the patient's complications

| ICD 9 code                                                                    | Classification of diagnosis           |
|-------------------------------------------------------------------------------|---------------------------------------|
| 420-429                                                                       | Congestive heart failure              |
| 430-438                                                                       | Cerebrovascular disease               |
| 490-496                                                                       | Chronic obstructive pulmonary disease |
| 570 -571,0706,0709,5733,5734,<br>5738,5739, 0700-0709,4560,4562,<br>5722-5728 | Liver disease                         |
| 342-343,3341,3440-3446,3449                                                   | Hemiplegia / paraplegia               |
| 140-172,1740-1958,200-208,2386                                                | Cancer                                |

**Supplementary Tables 3.** Variable data missing and proportion

| Variable                           | Number of missing | Proportion |
|------------------------------------|-------------------|------------|
| Age                                | 322               | 15.92%     |
| Race                               | 0                 | 0.00%      |
| Marital status                     | 0                 | 0.00%      |
| Admission type                     | 0                 | 0.00%      |
| Gender                             | 0                 | 0.00%      |
| Hematocrit (%)                     | 0                 | 0.00%      |
| Hemoglobin (g/dL)                  | 0                 | 0.00%      |
| Anion gap (mmol/L)                 | 7                 | 0.35%      |
| Bicarbonate (mmol/L)               | 4                 | 0.20%      |
| Blood Urea Nitrogen (mg/dl)        | 0                 | 0.00%      |
| Calcium (mg/dl)                    | 247               | 12.22%     |
| Chloride (mmol/L)                  | 2                 | 0.10%      |
| Creatinine (mg/dl)                 | 1                 | 0.05%      |
| Glucose (mg/dL)                    | 16                | 0.79%      |
| Sodium (mmol/L)                    | 2                 | 0.10%      |
| Potassium (mmol/L)                 | 1                 | 0.05%      |
| International normalized ratio (s) | 97                | 4.80%      |
| Heart rate (bmp)                   | 6                 | 0.30%      |
| Systolic blood pressure (mmHg)     | 10                | 0.49%      |
| Diastolic blood pressure (mmHg)    | 10                | 0.49%      |
| Respirate rate (bmp)               | 7                 | 0.35%      |
| Temperature (°C)                   | 123               | 6.08%      |
| SPO <sub>2</sub> (mmHg)            | 11                | 0.54%      |
| Congestive heart failure           | 0                 | 0.00%      |
| Cerebrovascular disease            | 0                 | 0.00%      |
| Chronic pulmonary disease          | 0                 | 0.00%      |
| Liver disease                      | 0                 | 0.00%      |
| Hemiplegia or paraplegia           | 0                 | 0.00%      |
| Cancer                             | 0                 | 0.00%      |

Note: The missing values matched the random miss model and were filled by using "Predictive mean matching (PMM)" in the MICE package, as described previously<sup>1</sup>.

---

<sup>1</sup> Z. Zhang: Multiple imputation with multivariate imputation by chained equation (MICE) package. *Ann Transl Med*, 4(2), 30 (2016) doi:10.3978/j.issn.2305-5839.2015.12.63
